# Supplementary material
Source: ML conference proceedings conference paper supplement (https://proceedings.neurips.cc/paper_files/paper/2022/hash/423295ba2cea13cda44dc0a7d48ae244-Abstract.html)
Supplement: Supplementary file 1 [file 423295ba2cea13cda44dc0a7d48ae244-Supplemental-Conference.zip]

Archive with 10 entries (9 files):
- tensor_supp/
- __MACOSX/._tensor_supp
- tensor_supp/.DS_Store
- __MACOSX/tensor_supp/._.DS_Store
- tensor_supp/proj_b1.m
- __MACOSX/tensor_supp/._proj_b1.m
- tensor_supp/pgd_tensor.m
- __MACOSX/tensor_supp/._pgd_tensor.m
- tensor_supp/tensor_2022_full.pdf
- __MACOSX/tensor_supp/._tensor_2022_full.pdf
